# Supplementary material for: Exonuclease mutations in DNA polymerase epsilon reveal replication strand specific mutation patterns and human origins of replication
Source: HighWire-hosted journal article supplement (doi:10.1101/gr.174789.114), 2014-09-16
Supplement: Supplemental_Inventory.docx [file Supplemental_Inventory.docx]

Supplemental Inventory and Figure Legends

Supplemental Table S1. Polymerase mutations found in TCGA cancers.

A) POLE-exo* mutations found in TCGA cancers

B) POLD1-exo* mutations found in TCGA cancers

Supplemental Table S2. Amino acid changes as a result of POLE-exo* mutation preferences summary table.

Supplemental Table S3. Amino acid changes as a result of POLE-exo* mutation preferences

A) Endometrial amino acid change matrix

B) Colorectal amino acid change matrix

Supplemental Table S4. List of genes with homopolymer regions used for our MSI assay.

Supplemental Table S5. Distance of Polymerase mutations to the exonuclease active site.

Supplemental Figure S1. Base context in which mutations occur in POLE-exo* Colorectal and Endometrial tumors.

Supplemental Figure S2. Human DNA POLE-exo* / DNA POLD1-exo* mapped to 3D structure of yeast Pol by homology.

1. POLE(PDB accession 4M8O)
2. POLD1(PDB accession 3IAY)
3. Frequency of base substitutions in Colorectal and Endometiral tumors in the least common mutation group.

Supplemental Figure S3. Pol ε cancer mutations have little effect on DNA polymerization activity.

Supplemental Figure S4. Group B Pol ε cancer mutations do not inhibit 3'→5' exonuclease activity.

Supplemental Figure S5. POLE-exo* context mutations are spatially correlated in all WGS POLE-exo* samples.

Supplemental Figure S6. POLE-exo* C→A and G→T mutations mapped to regions upstream of *TOP1* and *DHFR* ORI.

Supplemental Figure S7. Homopolymer Assay to detect MSI status.
