# Supplementary material for: Exonuclease mutations in DNA polymerase epsilon reveal replication strand specific mutation patterns and human origins of replication
Source: HighWire-hosted journal article supplement (doi:10.1101/gr.174789.114), 2014-09-16
Supplement: Supplemental_Tables.xlsx [file Supplemental_Tables.xlsx]

## Sheet: SuppTable 1A POLE mutations
Supplementary Table 1A. All mutations of POLE from large-scale sequencing projects
Cancera	Sample IDb	AA 1c	AA 2	AA 3	AA 4	AA 5	AA 6	AA 7	Mutational Subgroupd	Amino Acid Position	Domaine	MSI statusf	C→A fraction	Mut/Mb	Group
ECC	TCGA-B5-A11Y	R34C	P102L	.	.	.	.		MSI	34	uracil	MSS	0.0456081	34.4099	.
STAD	TCGA-BR-4362	D225N	.	.	.	.	.		MSI	225	int	MSI	nt	21.1	.
CRC	TCGA-AA-3864	R231H	.	.	.	.	.		MSI	231	int	MSI	0.0754373	89.004	.
HNSC	TCGA-DQ-7595	P269S	.	.	.	.	.		nt	269	exo	nt	0.12	9.47	B
BRCA	TCGA-BH-A0DL	T279N	.	.	.	.	.		nt	279	exo	nt	0.2	1.10082	B
CRC	587222	P286R	.	.	.	.	.		Ultra	286	exo	MSS	0.50913	76	A
CRC	587376	P286R	.	.	.	.	.		Ultra	286	exo	MSS	0.412797	311	A
CRC	TCGA-F5-6814	P286R	.	.	.	.	.		Ultra	286	exo	MSS	0.357388	169.519	A
CRC	TCGA-CA-6717	P286S	L1235I	R1371X	.	.	.		Ultra	286	exo	MSS	0.299464	157.022	A
CRC	TCGA-AA-3555	P286H	.	.	.	.	.		Ultra	286	exo	MSS	0.29813	84.95	A
CRC	TCGA-CA-6718	P286R	.	.	.	.	.		Ultra	286	exo	MSS	0.352766	62.9427	A
ECC	TCGA-B5-A0JY	P286R	F815L	.	.	.	.		Ultra	286	exo	MSS	0.411138	345.767	A
ECC	TCGA-BS-A0UV	P286R	S1380L	L1561P	.	.	.		Ultra	286	exo	MSS	0.34857	302.97	A
ECC	TCGA-BS-A0UF	P286R	C2109R	.	.	.	.		Ultra	286	exo	MSS	0.424681	278.649	A
ECC	TCGA-AX-A0J0	P286R	.	.	.	.	.		Ultra	286	exo	MSS	0.393288	273.937	A
ECC	TCGA-AX-A05Z	P286R	F1907L	S1930*	.	.	.		Ultra	286	exo	MSS	0.42085	233.81	A
ECC	TCGA-D1-A17Q	P286R	.	.	.	.	.		Ultra	286	exo	MSS	0.360395	202.354	A
ECC	TCGA-D1-A16X	P286R	D1129G	.	.	.	.		Ultra	286	exo	MSS	0.331026	69.2991	A
ECC	TCGA-B5-A11N	P286R	.	.	.	.	.		Ultra	286	exo	MSS	0.299609	60.0976	A
PAAD	TCGA-IB-7651	P286R	A2243T	H1440R	L1327M	P286R	P441L,Q1335_splice		Ultra	286	exo	nt	0.21	421.78	A
BRCA	TCGA-AN-A046	P286R	R1826W						Ultra	286	exo	nt	0.366392	194.319	A
CRC	TCGA-A6-6141	S297F	.	.	.	.	.		Ultra	297	exo	MSS	0.343905	18.6857	A
ECC	TCGA-AP-A059	S297F	L35M	A25T	S554	L2112M	.		Ultra	297	exo	MSS	0.323963	374.613	A
LGG	TCGA-DU-6392	S297Y	S497P	A1209D	R1556W	F1606Y	R1879C	L2274M	Ultra	297	exo	nt	0.249576	378.466	A
BLCA	TCGA-FD-A3B6	E311D	.	.	.	.	.		nt	311	exo	nt	0.125641	8.4	B
CRC	TCGA-AA-3977	F367S	K777N	.	.	.	.		Ultra	367	exo	MSS	0.357759	117.43	A
GBM	TCGA-19-1787	A399V							nt	399	exo	nt	nt	17.6	B
CRC	TCGA-AA-A00N	V411L	L1255V	.	.	.	.		Ultra	411	exo	MSS	0.205845	167.58	A
CRC	TCGA-AA-3984	V411L	.	.	.	.	.		Ultra	411	exo	MSS	0.222061	136.4	A
CRC	TCGA-AZ-4315	V411L	R1556W	.	.	.	.		Ultra	411	exo	MSS	0.22	124.31	A
CRC	TCGA-EI-6917	V411L	A426V	.	.	.	.		Ultra	411	exo	MSS	0.208481	113.898	A
ECC	TCGA-AP-A0LM	V411L	Q214R	.	.	.	.		Ultra	411	exo	MSS	0.219735	430.768	A
ECC	TCGA-B5-A11E	V411L	G904	R1364C	V1555	R1879C	C2238		Ultra	411	exo	MSS	0.209383	362.954	A
ECC	TCGA-AP-A056	V411L	L1235I	R1826W	I2199	.	.		Ultra	411	exo	MSS	0.271631	302.217	A
ECC	TCGA-A5-A0GP	V411L	.	.	.	.	.		Ultra	411	exo	MSS	0.248655	55.541	A
ECC	TCGA-D1-A16Y	V411L	.	.	.	.	.		Ultra	411	exo	MSS	0.215981	38.8065	A
GBM	TCGA-06-5416	V411L	R680C	S1827L	.	.	.		Ultra	411	exo	nt	0.256319	337.839	A
STAD	TCGA-BR-8680	V411L	Y2003C	.	.	.	.		Ultra	411	exo	MSS	nt	176	A
BRCA	TCGA-E9-A247	Y416H	.	.	.	.	.		nt	416	exo	nt	0.16	0.858795	B
BRCA	TCGA-D8-A1JG	L424V	.	.	.	.	.		nt	424	exo	nt	0.212903	2.7	A
ECC	TCGA-AP-A051	L424I	G1425	L2083	.	.	.		Ultra	424	exo	MSI	0.284035	298.282	A
ECC	TCGA-BG-A0VX	L424V	.	.	.	.	.		MSS	424	exo	MSS	0.246696	6.69262	A
ECC	TCGA-AP-A1DQ	A428T	.	.	.	.	.		MSS	428	exo	MSS	0.111111	0.850633	B
CRC	TCGA-AA-A010	P436R	A189T	.	.	.	.		Ultra	436	exo	MSS	0.345896	262	A
KICH	TCGA-KN-8428	V437M	.	.	.	.	.		MSI	437	exo	MSI	0.0362438	13.9677	B
BRCA	TCGA-BH-A0W4	D440N	.	.	.	.	.		MSS	440	exo	nt	0.0921053	0.9	B
ECC	TCGA-BS-A0TC	M444K	.	.	.	.	.		Ultra	444	exo	MSS	0.449114	46.2573	A
ECC	TCGA-B5-A11H	Q453R	.	.	.	.	.		MSI	453	exo	MSI	0.10041	28.7126	B
CRC	TCGA-AA-3510	A456P	P135S	.	.	.	.		Ultra	456	exo	MSS	0.306452	62.2532	A
ECC	TCGA-D1-A103	A456P	H144Q	T1104M	S1644L	A1967V	.		Ultra	456	exo	MSS	0.251163	246.02	A
CRC	TCGA-AG-A002	S459F	R150X	.	.	.	.		Ultra	459	exo	MSS	0.409867	376.18	A
CRC	TCGA-AG-3892	S459F	.	.	.	.	.		Ultra	459	exo	MSS	0.358839	81.28	A
ECC	TCGA-AX-A0J1	A465V	.	.	.	.	.		MSI	465	exo	MSI	0.082618	180.703	B
CRC	TCGA-AD-6964	Y473C	.	.	.	.	.		MSI	473	int	MSI	0.0972549	41.7055	.
ECC	TCGA-BS-A0UM	A566T	.	.	.	.	.		MSI	566	pol	MSI	0.121387	11.7793	.
CRC	TCGA-CM-6678	G628R	.	.	.	.	.		MSS	628	pol	MSS	0.0793651	3.96979	.
CRC	TCGA-EI-6882	R759C	.	.	.	.	.		MSI	759	pol	MSI	0.0640512	44	.
CRC	TCGA-AA-3525	R762W	K008N	.	.	.	.		MSI	762	pol	MSI	0.108065	32.8108	.
ECC	TCGA-BG-A18A	R976S	.	.	.	.	.		MSS	976	pol	MSS	0.138889	2.16301	.
CRC	TCGA-AZ-6598	T1052M	.	.	.	.	.		MSI	1052	pol	MSI	0.117705	82.3384	.
ECC	TCGA-A5-A0VP	A1140T	.	.	.	.	.		MSI	1140	pol	MSI	0.0568112	49.696	.
CRC	TCGA-AA-3833	R1160H	.	.	.	.	.		MSI	1160	int	MSI	0.121324	17.4453	.
CRC	TCGA-D5-6540	A1224T	.	.	.	.	.		MSI	1224	int	MSI	0.159381	41.0525	.
CRC	TCGA-AA-3518	V1368M	.	.	.	.	.		MSI	1368	int	MSI	0.134251	28.0017	.
CRC	TCGA-AA-3710	P1421S	.	.	.	.	.		MSI	1421	int	MSI	0.152593	43.6133	.
GBM	TCGA-16-0846	V1446fs	.	.	.	.	.		nt	1456	int	nt	0.149425	1.8	.
CRC	TCGA-AZ-6601	R1519C	.	.	.	.	.		MSI	1519	duf	MSI	0.107003	53.8305	.
CRC	TCGA-A6-6781	P1547S	.	.	.	.	.		MSI	1547	duf	MSI	0.0718447	56.7877	.
ECC	TCGA-BG-A0LX	E1698D	.	.	.	.	.		MSI	1698	duf	MSI	0.132898	14.687	.
CRC	TCGA-AA-3678	D1752N	.	.	.	.	.		MSS	1752	duf	MSS	0.0657895	2.43576	.
ECC	TCGA-AP-A054	Y1889C	.	.	.	.	.		MSI	1889	duf	MSI	0.0509383	35.9818	.
CRC	TCGA-AG-A01W	D2013N	.	.	.	.	.		MSS	2013	int	MSS	0.155039	4.14738	.
CRC	TCGA-D5-6930	T2049A	.	.	.	.	.		MSI	2049	int	MSI	0.104889	42.7594	.
CRC	TCGA-AA-A00J	A2056T	.	.	.	.	.		MSI	2056	int	MSI	0.141739	57.0743	.
CRC	TCGA-CM-5861	V2152M	.	.	.	.	.		MSI	2152	int	MSI	0.134365	43.9456	.
CRC	TCGA-CM-6162	D2166N	.	.	.	.	.		MSI	2166	int	MSI	0.0538462	34.5508	.
CRC	TCGA-CM-4746	G2285D	.	.	.	.	.		MSI	2285	int	MSI	0.0859155	26.8388	.
a, Cancers are BLCA, bladder carcinoma; BRCA, breast carcinoma; CRC, colorectal adenocarcinoma; EEC, endometrial endometrioid carcinoma; GBM, glioblastoma multiforme; KICH, renal cell chromophobe carcinoma; LGG, low grade glioma; STAD, gastric adenocarcinoma.
b, Sample IDs pertain to TCGA sample IDs were applicable.
c, aa1 is chosen from samples with multiple mutations in POLE as the one in the exonuclease domain or in order across the protein if one is not present
d, Mutational subgroups as follows: Ultra, POLE-exo phenotype group A; MSI, POLE-exo phenotype group B or MSI; MSS, microsatellite stable and chromosome instable. (See Table 1.)
e, uracil, uracil binding domain, exo, exonuclease domain,268-471; int, interdomain region; pol, polymerase, 531-1153; duf, domain of unknown function, 1525-1925. Regions based on SWISS-PROT annotation.
f, MSI was determined experimentally within the TCGA project. Patienst AP-AO59 and D1-A103 were changed from MSI to MSS and AP-A056, D1-A16Y, D1-A17Q were changed from MSI-L to MSS after analysis of DNA sequcence data (see Supplemental Figure S7).

## Sheet: SuppTable 1B POLD1 mutations
Supplementary Table 1B. All mutations of POLD1 from large-scale sequencing projects.
Cancera	Sample IDb	AA 1c	AA 2	AA 3	Mutational Subgroupd	Amino Acid Position	Domaine	MSI statusf	C→A fraction	Mut/Mb	Co-occuring Pol-exo	Group
CRC	TCGA-AZ-6598	P112fs	.	.	MSI	112	int	MSI	0.12	38.7	.	.
EEC	TCGA-D1-A17R	A127T	.	.	MSI	127	int	MSI	0.09	5.1	.	.
CRC	TCGA-AA-3710	A145D	.	.	MSI	145	int	MSI	0.16	46.1	.	.
CRC	TCGA-G4-6588	R195Q	.	.	MSI	195	int	MSI	0.13	32.8	.	.
EEC	TCGA-D1-A15X	G262S	.	.	MSS	262	int	MSS	0.06	55.7	.	.
BRCA	TCGA-E9-A1NA	R311C	.	.	nt	311	exo	nt	0.232558	3.32		Bg
PAAD	TCGA-IB-7651	R311H	.	.	Ultra	311	exo	nt	0.212344	421	P286R	A
STAD	TCGA-BR-8591	R311C	.	.	MSI	311	exo	MSI	0.09	50.272	.	B
STAD	TCGA-BR-6452	D316N	.	.	Ultra	316	exo	MSS	0.0977118	286.83	.	Unclassified
STAD	TCGA-EQ-A4SO	G324V	.	.	MSI	324	exo	MSI	0.08	5.2	.	B
CRC	TCGA-A6-6780	R352C	.	.	MSI	352	exo	MSI	0.14	22.5	.	B
HNSC	TCGA-CR-5247	D389H	.	.	nt	389	exo	nt	0.0934579	2.93083	.	B
EEC	TCGA-A5-A0VP	V392M	.	.	MSI	392	exo	MSI	0.06	49.7	.	B
KIRC	TCGA-B0-5080	V392M	.	.	nt	392	exo	nt	0.194444	2.34765	.	Bg
CRC	587316	R423H			MSI	423	exo	MSI	na	34.2	.	B
CRC	TCGA-D5-6927	L427I	.	.	MSI	427	exo	MSI	0.13	12.2	.	B
CRC	TCGA-AD-5900	T441M	.	.	MSI	441	exo	MSI	0.13	23	.	B
CRC	TCGA-AA-3949	Q461H	.	.	MSI	461	exo	MSI	0.13	30.9	.	B
EEC	TCGA-D1-A17M	V556I	.	.	MSI	556	int	MSI	0.13	12	.	.
EEC	TCGA-B5-A11H	T582M	.	.	MSI	582	pol	MSI	0.1	28.7	.	.
CRC	TCGA-CK-5913	V596I	.	.	MSI	596	pol	MSI	0.15	12.4	.	.
EEC	TCGA-AP-A059	I598V	A599V	R823H	Ultra	599	pol	MSS	0.32	374.6	S297F	.
EEC	TCGA-D1-A17D	L606V	.	.	MSI	606	pol	MSI	0.17	14.6	.	.
EEC	TCGA-AP-A05H	F637L	.	.	MSS	637	pol	MSS	0.15	2.4	.	.
LGG	TCGA-HT-8564	A692V	.	.	nt	692	pol	na	na	na	.	.
EEC	TCGA-BG-A0MQ	V700I	.	.	MSS	700	pol	MSS	0.12	17.2	.	.
CRC	TCGA-AA-3947	P787L	.	.	MSI	787	pol	MSI	0.16	57	.	.
CRC	TCGA-AA-A00J	R808H	.	.	MSI	808	pol	MSI	0.15	59.2	.	.
CRC	TCGA-CK-5916	814_815del	.	.	MSI	814	pol	MSI	0.11	24.5	.	.
CRC	TCGA-EI-6507	L852R	.	.	MSI	852	pol	MSI	0.15	14.6	.	.
CRC	TCGA-AY-6197	A864T	C873R	.	MSI	864	pol	MSI	0.13	27.6	.	.
CRC	TCGA-AA-3516	A864T	.	.	MSI	864	pol	MSI	0.14	44.9	.	.
GBM	TCGA-19-5951	R875H	.	.	MSS	875	pol	MSS	0.08	2	.	.
CRC	TCGA-F5-6464	I878V	.	.	MSS	878	pol	MSS	0.14	1.8	.	.
CRC	TCGA-A6-5665	A930fs	.	.	MSI	930	pol	MSI	0.12	27.9	.	.
EEC	TCGA-BS-A0TA	C949F	.	.	MSI	949	pol	MSI	0.13	11.9	.	.
CRC	TCGA-AA-3663	Splice_Site	.	.	MSI	.	int	MSI	0.15	49	.	.
CRC	TCGA-AD-6964	Splice_Site	.	.	MSI	.	int	MSI	0.1	24.2	.	.
CRC	TCGA-CM-4743	Splice_Site	.	.	MSI	.	int	MSI	0.15	16.4	.	.
CRC	TCGA-CM-5861	Splice_Site	.	.	MSI	.	int	MSI	0.14	23.5	.	.
CRC	TCGA-A6-4105	Splice_Site	.	.	MSS	.	int	MSS	0.16	2.9	.	.
a, Cancers are BLCA, bladder carcinoma; BRCA, breast carcinoma; CRC, TCGA COAD/READ (colorectal adenocarcinoma); EEC, endometrial endometrioid carcinoma; GBM, glioblastoma multiforme; KICH, renal cell chromophobe carcinoma; LGG, low grade glioma; STAD, gastric adenocarcinoma.
b, Sample IDs pertain to TCGA sample IDs were applicable.
c, In patients with multiple POLD1 mutations, AA1 is chosen as the exonuclease domain, AA2 and 3 are in order across the protein if one is not present
d, Mutational subgroups as follows: Ultra, POLE-exo phenotype class A; MSI, microsattelite instable; MSS, microsatellite stable and chromosome instable. (See Table 1.)
e, exo, exonuclease domain,305-517; int, interdomain region; pol, polymerase, 579-974; Regions based on SWISS-PROT annotation.
f, MSI was determined experimentally within the TCGA project. Patient AP-AO59 was changed from MSI to MSS after analysis of DNA sequcence data (see Supplemental Figure S7).
g, POLD1 exo* with relatively high C->A but very low mutation frequency, provisionally classified as Group B due to small mutation sample size.
h, Mutation to Asn of the catalytic residue Asp316, resulted in >100 mut/Mb but no increase in C->A frequency.

## Sheet: SuppTable 2 R,S change
Supplementary Table 2 Amino acid change frequencies for Ser(S) and Arg(R)
										Arg		Ser				Arg						Ser
										AGA		TCG				CGA						TCT
A) Endometrial										to		to				to						to
										ATA		TTG				CAA						TAT
	Reference codon	Ref AA	A	C	D	E	F	G	H	I	K	L	M	N	P	Q	R	S	T	V	W	Y	X	Total			C) Chi square p-value
Pol Exo	CGA/AGA	R	0	3385	0	0	0	69	2798	2939	470	130	393	0	4	5160		173	2	0	2019	0	3203	20745			Cancer	aa change	pvalue-all	Ultra->MSI	Ultra->MSS
		percent	0	0.163172	0	0	0	0.0033261	0.134876	0.141673	0.0226561	0.00626657	0.0189443	0	0.000192818	0.248735		0.00833936	9.64088e-05	0	0.0973247	0	0.154399				EEC	S->L	< 2.2e-16	< 2.2e-16	0.07035
	TCG/TCT	S	159	17	0	0	757	97	0	548	0	2125	0	599	398	0	273		65	0	0	2977	355	8370			EEC	S->Y	< 2.2e-16	< 2.2e-16	< 2.2e-16
		percent	0.0189964	0.00203106	0	0	0.0904421	0.011589	0	0.0654719	0	0.253883	0	0.0715651	0.0475508	0	0.0326165		0.00776583	0	0	0.355675	0.0424134				EEC	R->I	< 2.2e-16	< 2.2e-16	< 2.2e-16
																											EEC	R->Q	< 2.2e-16	< 2.2e-16	9.343e-10
MSI	CGA/AGA	R	0	1804	0	0	0	163	2307	144	138	121	263	0	16	1329		107	10	0	1208	0	948	8558			Cancer	aa change	pvalue-all	Ultra->MSI	Ultra->MSS
		percent	0	0.210797	0	0	0	0.0190465	0.269572	0.0168264	0.0161253	0.0141388	0.0307315	0	0.0018696	0.155293		0.0125029	0.0011685	0	0.141154	0	0.110774				CRC	S->L	2.937e-14	2.937e-14	8.869e-08
	TCG/TCT	S	41	36	0	0	199	186	0	277	0	308	0	523	201	0	118		68	0	4	267	29	2257			CRC	S->Y	< 2.2e-16	< 2.2e-16	< 2.2e-16
		percent	0.0181657	0.0159504	0	0	0.0881701	0.0824103	0	0.122729	0	0.136464	0	0.231724	0.0890563	0	0.0522818		0.0301285	0	0.00177226	0.118299	0.0128489				CRC	R->I	< 2.2e-16	< 2.2e-16	< 2.2e-16
																											CRC	R->Q	< 2.2e-16	< 2.2e-16	< 2.2e-16
MSS	CGA/AGA	R	0	401	0	0	0	91	441	23	61	57	6	0	55	415		39	44	0	313	0	244	2190
		percent	0	0.183105	0	0	0	0.0415525	0.20137	0.0105023	0.0278539	0.0260274	0.00273973	0	0.0251142	0.189498		0.0178082	0.0200913	0	0.142922	0	0.111416
	TCG/TCT	S	9	106	0	0	97	24	0	26	0	166	0	47	39	0	56		26	0	13	43	92	744
		percent	0.0120968	0.142473	0	0	0.130376	0.0322581	0	0.0349462	0	0.223118	0	0.063172	0.0524194	0	0.0752688		0.0349462	0	0.0174731	0.0577957	0.123656
B) Colorectal
	Susceptable codon	Ref AA	A	C	D	E	F	G	H	I	K	L	M	N	P	Q	R	S	T	V	W	Y	X	Total
Pol Exo	CGA/AGA	R	0	2144	0	0	0	34	1555	2161	332	51	115	0	3	3976		101	4	0	1254	0	2211	13941
		percent	0	0.15	0	0	0	0	0.11	0.155	0.02	0	0.01	0	0	0.285		0.01	0	0	0.09	0	0.16
	TCG/TCT	S	133	16	0	0	499	21	0	204	0	1561	0	358	289	0	161		29	0	0	1993	260	5524
		percent	0.02	0	0	0	0.09	0	0	0.04	0	0.28	0	0.06	0.05	0	0.03		0.01	0	0	0.36	0.05
MSI	CGA/AGA	R	0	3321	0	0	0	166	4121	65	98	166	279	0	19	2460		171	9	0	2225	0	1405	14505
		percent	0	0.23	0	0	0	0.01	0.28	0.004	0.01	0.01	0.02	0	0	0.17		0.01	0	0	0.15	0	0.1
	TCG/TCT	S	74	54	0	0	165	191	0	176	0	481	0	498	262	0	167		125	0	1	132	68	2394
		percent	0.03	0.02	0	0	0.07	0.08	0	0.07	0	0.2	0	0.21	0.11	0	0.07		0.05	0	0	0.06	0.03
MSS	CGA/AGA	R	0	1472	0	0	0	101	1866	82	141	168	32	0	56	1481		152	63	0	1191	0	930	7735
		percent	0	0.19	0	0	0	0.01	0.24	0.011	0.02	0.02	0	0	0.01	0.191		0.02	0.01	0	0.15	0	0.12
	TCG/TCT	S	36	142	0	0	188	78	0	112	0	399	0	159	110	0	160		137	0	5	146	155	1827
		percent	0.02	0.08	0	0	0.1	0.04	0	0.06	0	0.22	0	0.09	0.06	0	0.09		0.07	0	0	0.08	0.08
	= highest values in row
	Arg mutation
	Ser mutation
	silent mutation

## Sheet: SuppTable 3A EEC aa change
Supplementary Table 3A. Amino acid changes in EEC tumors																																											Reference Table
																																											number of changes to get to a stop codon from this amino acid change
Pol ε-exo*	Ref AA	A	C	D	E	F	G	H	I	K	L	M	N	P	Q	R	S	T	V	W	Y	X	Total	Key																				A	C	D	E	F	G
	A		0	452	31	0	37	0	0	0	0	0	0	27	0	0	410	2756	2559	0	0	0	6272	>5000																			A	0	2	1	1	2	1
	C	0		0	0	27	40	0	0	0	0	0	0	0	0	129	14	0	0	26	185	147	568	3000-4000																			C	2	0	2	2	1	1
	D	160	0		195	0	564	5	0	0	0	0	2560	0	0	0	0	0	42	0	2239	0	5765	2000-3000																			D	1	2	0	1	2	1
	E	222	0	3182		0	375	0	0	3878	0	0	0	0	5	0	0	0	46	0	0	5652	13360	1000-2000																			E	1	2	1	0	2	1
	F	0	827	0	0		0	0	59	0	2640	0	0	0	0	0	281	0	532	0	45	0	4384	1-1000																			F	2	1	2	2	0	2
	G	17	278	684	441	0		0	0	0	0	0	0	0	0	449	410	0	334	79	0	402	3094																				G	1	1	1	1	2	0
	H	0	0	3	0	0	0		0	0	1	0	302	23	67	188	0	0	0	0	194	0	778																				H	2	2	1	2	2	2
	I	0	0	0	0	27	0	0		1	213	418	36	0	0	17	325	295	249	0	0	0	1581																				I	2	2	2	2	1	2
	K	0	0	0	365	0	0	0	48		0	30	3562	0	525	281	0	1411	0	0	0	55	6277																				K	2	2	2	1	2	2
	L	0	0	0	0	791	0	26	2727	0		837	0	202	3	340	147	0	439	16	0	77	5605																				L	2	2	2	2	1	2
	M	0	0	0	0	0	0	0	490	3	65		0	0	0	24	0	111	109	0	0	0	802																				M	2	2	2	2	2	2
	N	0	0	278	0	0	0	616	47	210	0	0		0	0	0	401	274	0	0	28	0	1854																				N	2	2	1	2	2	2
	P	11	0	0	0	0	0	617	0	0	665	0	0		86	14	1012	297	0	0	0	0	2702																				P	1	2	2	2	2	2
	Q	0	0	0	12	0	0	1122	0	136	16	0	0	97		172	0	0	0	0	0	230	1785																				Q	2	2	2	1	2	2
	R	0	3385	0	0	0	69	2798	2939	470	130	393	0	4	5160		173	2	0	2019	0	3203	20745																				R	2	1	2	2	2	1
	S	159	17	0	0	757	97	0	548	0	2125	0	599	398	0	273		65	0	0	2977	355	8370																				S	1	1	2	2	1	1
	T	745	0	0	0	0	0	0	458	20	0	722	220	99	0	9	47		0	0	0	0	2320																				T	1	2	2	2	2	2
	V	779	0	25	3	106	103	0	895	0	170	587	0	0	0	0	0	0		0	0	0	2668																				V	1	2	1	1	1	1
	W	0	74	0	0	0	24	0	0	0	36	0	0	0	0	88	1	0	0		0	256	479																				W	2	1	2	2	2	1
	Y	0	323	95	0	10	0	217	0	0	0	0	7	0	0	0	31	0	0	0		191	874																				Y	2	1	1	2	1	2
																																											Reference table legend
																																												2 amino acid mutations are required for this change
																																												3 amino acid mutations are required for this change
MSI	Ref AA	A	C	D	E	F	G	H	I	K	L	M	N	P	Q	R	S	T	V	W	Y	X	Total	Key
	A		0	239	37	0	18	0	0	0	0	0	0	25	0	0	219	2411	2341	0	0	0	5290	>2000
	C	0		0	0	22	21	0	0	0	0	0	0	0	0	151	27	0	0	11	439	73	744	1500-2000
	D	23	0		104	0	266	18	0	0	0	0	553	0	0	0	0	0	53	0	237	0	1254	1000-1500
	E	60	0	571		0	223	0	0	607	0	0	0	0	32	0	0	0	52	0	0	320	1865	500-1000
	F	0	39	0	0		0	0	36	0	223	0	0	0	0	0	112	0	73	0	24	0	507	1-500
	G	37	247	626	183	0		0	0	0	0	0	0	0	0	400	389	0	219	130	0	182	2413
	H	0	0	5	0	0	0		0	0	10	0	51	7	70	199	0	0	0	0	320	0	662
	I	0	0	0	0	48	0	0		10	34	77	57	0	0	4	53	206	218	0	0	0	707
	K	0	0	0	212	0	0	0	10	0	0	20	431	0	34	155	0	80	0	0	0	21	963
	L	0	0	0	0	266	0	23	472	0		478	0	428	23	93	124	0	78	3	0	19	2007
	M	0	0	0	0	0	0	0	292	14	32		0	0	0	5	0	205	167	0	0	1	716
	N	0	0	194	0	0	0	31	47	96	0	0		0	0	0	193	36	0	0	15	0	612
	P	31	0	0	0	0	0	503	0	0	677	0	0		62	15	680	212	0	0	0	0	2180
	Q	0	0	0	20	0	0	483	0	51	14	0	0	40		345	0	0	0	0	0	496	1449
	R	0	1804	0	0	0	163	2307	144	138	121	263	0	16	1329		107	10	0	1208	0	948	8558
	S	41	36	0	0	199	186	0	277	0	308	0	523	201	0	118		68	0	4	267	29	2257
	T	422	0	0	0	0	0	0	567	17	0	861	124	32	0	16	73		0	0	0	0	2112
	V	445	0	32	17	52	38	0	955	0	104	816	0	0	0	0	0	0		0	0	0	2459
	W	0	56	0	0	0	15	0	0	0	32	0	0	0	0	97	0	0	0		0	241	441
	Y	0	280	12	0	26	0	227	0	0	0	0	25	0	0	0	8	0	0	0		82	660
MSS	Ref AA	A	C	D	E	F	G	H	I	K	L	M	N	P	Q	R	S	T	V	W	Y	X	Total	Key
	A		0	26	15	0	24	0	0	0	0	0	0	24	0	0	72	305	281	0	0	0	747	>400
	C	0		0	0	36	7	0	0	0	0	0	0	0	0	14	11	0	0	6	49	15	138	300-400
	D	9	0		42	0	54	84	0	0	0	0	204	0	0	0	0	0	15	0	70	0	478	200-300
	E	20	0	82		0	36	0	0	414	0	0	0	0	161	0	0	0	15	0	0	90	818	100-200
	F	0	7	0	0		0	0	2	0	82	0	0	0	0	0	12	0	15	0	11	0	129	1-100
	G	39	38	66	55	0		0	0	0	0	0	0	0	0	150	97	0	91	14	0	17	567
	H	0	0	17	0	0	0		0	0	11	0	26	5	29	50	0	0	0	0	51	0	189
	I	0	0	0	0	9	0	0		3	14	57	10	0	0	0	16	53	53	0	0	0	215
	K	0	0	0	40	0	0	0	3		0	10	87	0	14	31	0	12	0	0	0	18	215
	L	0	0	0	0	80	0	5	40	0		33	0	44	12	23	7	0	107	1	0	13	365
	M	0	0	0	0	0	0	0	87	7	7		0	0	0	10	0	19	33	0	0	0	163
	N	0	0	17	0	0	0	9	10	38	0	0		0	0	0	55	5	0	0	9	0	143
	P	32	0	0	0	0	0	23	0	0	183	0	0		24	42	94	71	0	0	0	0	469
	Q	0	0	0	60	0	0	78	0	50	12	0	0	18		43	0	0	0	0	0	124	385
	R	0	401	0	0	0	91	441	23	61	57	6	0	55	415		39	44	0	313	0	244	2190
	S	9	106	0	0	97	24	0	26	0	166	0	47	39	0	56		26	0	13	43	92	744
	T	58	0	0	0	0	0	0	79	22	0	208	22	13	0	10	39		0	0	0	0	451
	V	54	0	3	10	23	21	0	199	0	53	159	0	0	0	0	0	0		0	0	0	522
	W	0	24	0	0	0	3	0	0	0	15	0	0	0	0	11	2	0	0		0	40	95
	Y	0	47	4	0	9	0	26	0	0	0	0	12	0	0	0	6	0	0	0		42	146
EEC Amino Acid Change Table Legend
	0 mutations are found.
	highest number of mutations in that group
[truncated: 14 more columns]

## Sheet: SuppTable 3B CRC aa change
Supplementary Table 3B. Amino acid changes in CRC tumors																																						Reference Table number of changes to get to a stop codon from this amino acid change
Pol ε-exo*	Ref AA	A	C	D	E	F	G	H	I	K	L	M	N	P	Q	R	S	T	V	W	Y	X	Total	Key														A	C	D	E	F	G	H	I	K	L	M	N
	A	0	0	178	16	0	34	0	0	0	0	0	0	12	0	0	171	1613	1505	0	0	0	3529	>5000													A	0	2	1	1	2	1	2	2	2	2	2	2
	C	0	0	0	0	16	24	0	0	0	0	0	0	0	0	50	9	0	0	26	34	67	226	3000-4000													C	2	0	2	2	1	1	2	2	2	2	2	2
	D	117	0	0	123	0	444	2	0	0	0	0	1949	0	0	0	0	0	15	0	1637	0	4287	2000-3000													D	1	2	0	1	2	1	1	2	2	2	2	1
	E	209	0	2066	0	0	198	0	0	3175	0	0	0	0	7	0	0	0	27	0	0	3818	9500	1000-2000													E	1	2	1	0	2	1	2	2	1	2	2	2
	F	0	691	0	0	0	0	0	48	0	1982	0	0	0	0	0	173	0	445	0	24	0	3363	0-1000													F	2	1	2	2	0	2	2	1	2	1	2	2
	G	15	66	374	228	0	0	0	0	0	0	0	0	0	0	138	103	0	169	16	0	175	1284														G	1	1	1	1	2	0	2	2	2	2	2	2
	H	0	0	2	0	0	0	0	0	0	3	0	244	16	45	71	0	0	0	0	63	0	444														H	2	2	1	2	2	2	0	2	2	1	2	1
	I	0	0	0	0	25	0	0	0	7	172	369	40	0	0	13	228	158	132	0	0	0	1144														I	2	2	2	2	1	2	2	0	1	1	1	1
	K	0	0	0	186	0	0	0	28	0	0	15	2615	0	493	150	0	1192	0	0	0	30	4709														K	2	2	2	1	2	2	2	1	0	2	1	1
	L	0	0	0	0	539	0	16	1707	0	0	307	0	65	7	171	83	0	388	11	0	81	3375														L	2	2	2	2	1	2	1	1	2	0	1	2
	M	0	0	0	0	0	0	0	348	3	23	0	0	0	0	19	0	38	52	0	0	0	483														M	2	2	2	2	2	2	2	1	1	1	0	2
	N	0	0	149	0	0	0	502	27	169	0	0	0	0	0	0	266	239	0	0	19	0	1371														N	2	2	1	2	2	2	1	1	1	2	2	0
	P	10	0	0	0	0	0	192	0	0	172	0	0	0	41	4	496	145	0	0	0	0	1060														P	1	2	2	2	2	2	1	2	2	1	2	2
	Q	0	0	0	10	0	0	595	0	82	11	0	0	56	0	73	0	0	0	0	0	52	879														Q	2	2	2	1	2	2	1	2	1	1	2	2
	R	0	2144	0	0	0	34	1555	2161	332	51	115	0	3	3976	0	101	4	0	1254	0	2211	13941														R	2	1	2	2	2	1	1	1	1	1	1	2
	S	133	16	0	0	499	21	0	204	0	1561	0	358	289	0	161	0	29	0	0	1993	260	5524														S	1	1	2	2	1	1	2	1	2	1	2	1
	T	481	0	0	0	0	0	0	138	13	0	252	101	80	0	4	25	0	0	0	0	0	1094														T	1	2	2	2	2	2	2	1	1	2	1	1
	V	535	0	4	4	62	93	0	340	0	88	144	0	0	0	0	0	0	10	0	0	0	1280														V	1	2	1	1	1	1	2	1	2	1	1	2
	W	0	46	0	0	0	3	0	0	0	24	0	0	0	0	25	1	0	0	0	0	112	211														W	2	1	2	2	2	1	2	2	2	1	2	2
	Y	0	262	66	0	8	0	185	0	0	0	0	8	0	0	0	22	0	0	0	0	121	672														Y	2	1	1	2	1	2	1	2	2	2	3	1
																																					Reference table legend
MSI	Ref AA	A	C	D	E	F	G	H	I	K	L	M	N	P	Q	R	S	T	V	W	Y	X	Total	Key														2 amino acid mutations are required for this change
	A	0	0	244	79	0	70	0	0	0	0	0	0	61	0	0	309	3956	3494	0	0	0	8213	>2000														3 amino acid mutations are required for this change
	C	0	0	0	0	49	25	0	0	0	0	0	0	0	0	152	41	0	0	19	450	90	826	1500-2000
	D	53	0	0	152	0	402	26	0	0	0	0	783	0	0	0	0	0	130	0	164	11	1721	1000-1500
	E	104	0	562	0	0	267	0	0	904	0	0	0	0	46	0	0	0	82	0	0	201	2166	500-1000
	F	0	29	0	0	0	0	0	59	0	210	0	0	0	0	0	121	0	89	0	15	0	523	1-1000
	G	69	355	870	213	0	0	0	0	0	0	0	0	0	0	768	717	0	310	166	0	200	3668
	H	0	0	11	0	0	0	0	0	0	22	0	75	20	77	279	0	0	0	0	252	0	736
	I	0	0	0	0	74	0	0	0	8	44	114	108	0	0	4	35	289	287	0	0	1	964
	K	0	0	0	258	0	0	0	12	0	0	28	477	0	36	186	0	138	0	0	0	47	1182
	L	0	0	0	0	312	0	46	450	0	0	418	0	518	33	169	128	0	98	7	0	61	2240
	M	0	0	0	0	0	0	0	286	18	43	0	0	0	0	9	0	266	250	0	0	4	876
	N	0	0	233	0	0	0	23	82	104	0	0	0	0	0	0	212	52	0	0	21	3	730
	P	36	0	0	0	0	0	646	0	0	1145	0	0	0	159	30	879	301	0	0	0	0	3196
	Q	0	0	0	35	0	0	434	0	97	31	0	0	67	0	338	0	0	0	0	0	471	1473
	R	0	3321	0	0	0	166	4121	65	98	166	279	0	19	2460	0	171	9	0	2225	0	1405	14505
	S	74	54	0	0	165	191	0	176	0	481	0	498	262	0	167	0	125	0	1	132	68	2394
	T	549	0	0	0	0	0	0	467	19	0	1497	53	74	0	24	98	0	0	0	0	1	2782
	V	604	0	65	69	49	62	0	1335	0	114	1266	0	0	0	0	0	0	0	0	0	15	3579
	W	0	106	0	0	0	11	0	0	0	52	0	0	0	0	118	5	0	0	0	0	242	534
	Y	0	435	15	0	38	0	360	0	0	0	0	27	0	0	0	13	0	0	0	0	59	947
MSS	Ref AA	A	C	D	E	F	G	H	I	K	L	M	N	P	Q	R	S	T	V	W	Y	X	Total	Key
	A	0	0	137	109	0	91	0	0	0	0	0	0	98	0	0	350	1095	993	0	0	0	2873	>400
	C	0	0	0	0	132	31	0	0	0	0	0	0	0	0	31	95	0	0	26	124	52	491	300-400
	D	27	0	0	186	0	126	137	0	0	0	0	624	0	0	0	0	0	66	0	246	1	1413	200-300
	E	50	0	341	0	0	137	0	0	935	0	0	0	0	194	0	0	0	83	0	0	371	2111	100-200
	F	0	81	0	0	0	0	0	54	0	250	0	0	0	0	0	68	0	68	0	63	1	585	1-100
	G	125	126	262	235	0	0	0	0	0	0	0	0	0	0	575	477	0	331	67	0	51	2249
	H	0	0	47	0	0	0	0	0	0	29	0	74	35	88	70	0	0	0	0	145	0	488
	I	0	0	0	0	59	0	0	0	9	48	120	67	0	0	10	22	132	129	0	0	1	597
	K	0	0	0	139	0	0	0	45	0	0	58	327	0	68	139	0	180	0	0	0	85	1041
	L	0	0	0	0	302	0	74	163	0	0	126	0	126	67	85	34	0	281	11	0	62	1331
	M	0	0	0	0	0	0	0	234	25	66	0	0	0	0	11	0	44	74	0	0	0	454
	N	0	0	73	0	0	0	49	67	163	0	0	0	0	0	0	170	47	0	0	42	0	611
	P	94	0	0	0	0	0	113	0	0	824	0	0	0	94	92	334	182	0	0	0	0	1733
	Q	0	0	0	96	0	0	251	0	211	95	0	0	38	0	71	0	0	0	0	0	323	1085
	R	0	1472	0	0	0	101	1866	82	141	168	32	0	56	1481	0	152	63	0	1191	0	930	7735
	S	36	142	0	0	188	78	0	112	0	399	0	159	110	0	160	0	137	0	5	146	155	1827
	T	174	0	0	0	0	0	0	237	81	0	946	119	68	0	29	140	0	0	0	0	0	1794
	V	147	0	48	42	106	60	0	797	0	219	652	0	0	0	0	0	0	0	0	0	2	2073
	W	0	81	0	0	0	9	0	0	0	31	0	0	0	0	46	14	0	0	0	0	119	300
	Y	0	134	17	0	37	0	95	0	0	0	0	40	0	0	0	24	0	0	0	0	129	476
EEC Amino Acid Change Table Legend
	0 mutations are found.
	highest number of mutations in that group
[truncated: 8 more columns]

## Sheet: SuppTable 4  Homopolymer sites
Supplemental table 4. Homopolymer regions of genes used in DNA sequence test for MSI
Gene	length	chr	start	stop
Control	N10	chr3	30686318	30686327
AIM2	A10	chr1	159032487	159032496
ATR	A10	chr3	142274740	142274749
CASP5	A10	chr11	104879687	104879696
MBD4	A10	chr3	129155548	129155557
SEC63	A10	chr6	108214755	108214764
TGFBR2	A10	chr3	30691872	30691881
ASTE1	A11	chr3	130733047	130733057
TAF1B	A11	chr2	9989571	9989581
MLH1	A6	chr3	37050349	37050354
PTEN	A6	chr10	89717770	89717775
PTEN	A6	chr10	89720812	89720817
MSH2	A7	chr2	47639588	47639594
ACVR2A	A8	chr2	148657041	148657048
ACVR2A	A8	chr2	148683686	148683693
APAF1	A8	chr12	99071207	99071214
MSH3	A8	chr5	79970915	79970922
PMS2	A8	chr7	6027157	6027164
PRDM2	A8	chr1	14108560	14108567
BLM	A9	chr15	91304139	91304147
CHEK1	A9	chr11	125505378	125505386
GRB14	A9	chr2	165365288	165365296
PRDM2	A9	chr1	14108749	14108757
RAD50	A9	chr5	131931452	131931460
RHAMM	A9	chr5	162917426	162917434
TCF7L2	A9	chr10	114925317	114925325
WISP3	A9	chr6	112389434	112389442
AXIN2	C7	chr17	63532585	63532591
MSH6	C8	chr2	48030640	48030647
AXIN2	G6	chr17	63532556	63532561
BAX	G8	chr19	49461343	49461350
IGF2R2	G8	chr6	160485488	160485495
AIM2	T10	chr1	159032487	159032496
ATR	T10	chr3	142274740	142274749
CASP5	T10	chr11	104878041	104878050
MBD4	T10	chr3	129155548	129155557
SEC63	T10	chr6	108214755	108214764
SEC63	T10	chr6	108214774	108214782
AXIN2	T6	chr17	63526205	63526210
AXIN2	T6	chr17	63532654	63532659
MLH1	T6	chr3	37050315	37050320
FAS	T7	chr10	90768708	90768714
BCL10	T8	chr1	85736511	85736518
MLH3	T9	chr14	75514338	75514345
MLH3	T9	chr14	75514604	75514612
The gene, homopolymer length, chromosome, start and stop site of known homopolymers

## Sheet: SuppTable5 Distance to active 
Supplemental Table5. Distance from mutation to active site
Pol	Classa	Human residueb	Yeast residue	Angstroms to yeastD290*	Angstroms to yeastE292*	Average of Dist to Nearer AAc
E	A	P286R,H	P301	12	7.8
		S297F,Y	S312	3.2	3.1
		F367S	F382	5.8	6.8
		V411L	V426	11	19
		L424V,I	L439	4.3	11
		P436R	P451	12	10
		M444K	M459	13	3.8
		S459F	S474	4.8	3.1	6.3 +/- 3.1 A
E	B	P269S	P284	17.1	20.2
		T279N	T294	11.3	4.7
		E311D	E330	18	13.2
		A399V	S414	17.5	20.1
		Y416H	Y431	20.1	26.7
		A428T	T443	10.3	15.7
		V437M	I452	12.6	10.6
		D440N	D455	14.5	9.9
		Q453R	Q468	16	8.6
		A465V	A480	6.3	11.8	12.6 +/- 5.0 A
Pol	Classa	Human residueb	Yeast residue	Angstroms to yeastD320*	Angstroms to yeastE322*	Average of Dist to Nearer AAc
D1	B	R311C,H	R316	14	22
	unclassified	D316N	D321	0	3.2
		G324V	G329	19	14
		R352C	R357	10.5	17
		D389H	D394	16	19
		V392M	V397	11	19
		Q461H	Q466	12	17
		L427I	V432	21	20
		T441M	Y446	22	26
		R423H	R428	22	21	15.7 +/- 4.4 A
a, Class A, are mutations with C→A substitutions >0.2; class B are mutations with C→A substitution <0.2
b, Bold typeface are unconserved amino acids in human and yeast. All class A are conserved; class B are sometimes unconserved
c, Distance in bold type face was used to calculate average distance to active site. The distance measuments were estimated using the PyMol measurment function.
*humanPol e active site D275 E277
*human Pol d active site D316 E318
